# Supplementary figures and images for: Ecological association between a deprivation index and mortality in France over the period 1997 – 2001: variations with spatial scale, degree of urbanicity, age, gender and cause of death
Source: Springer Nature journal article supplement (doi:10.1186/1471-2458-9-33), 2009-01-22

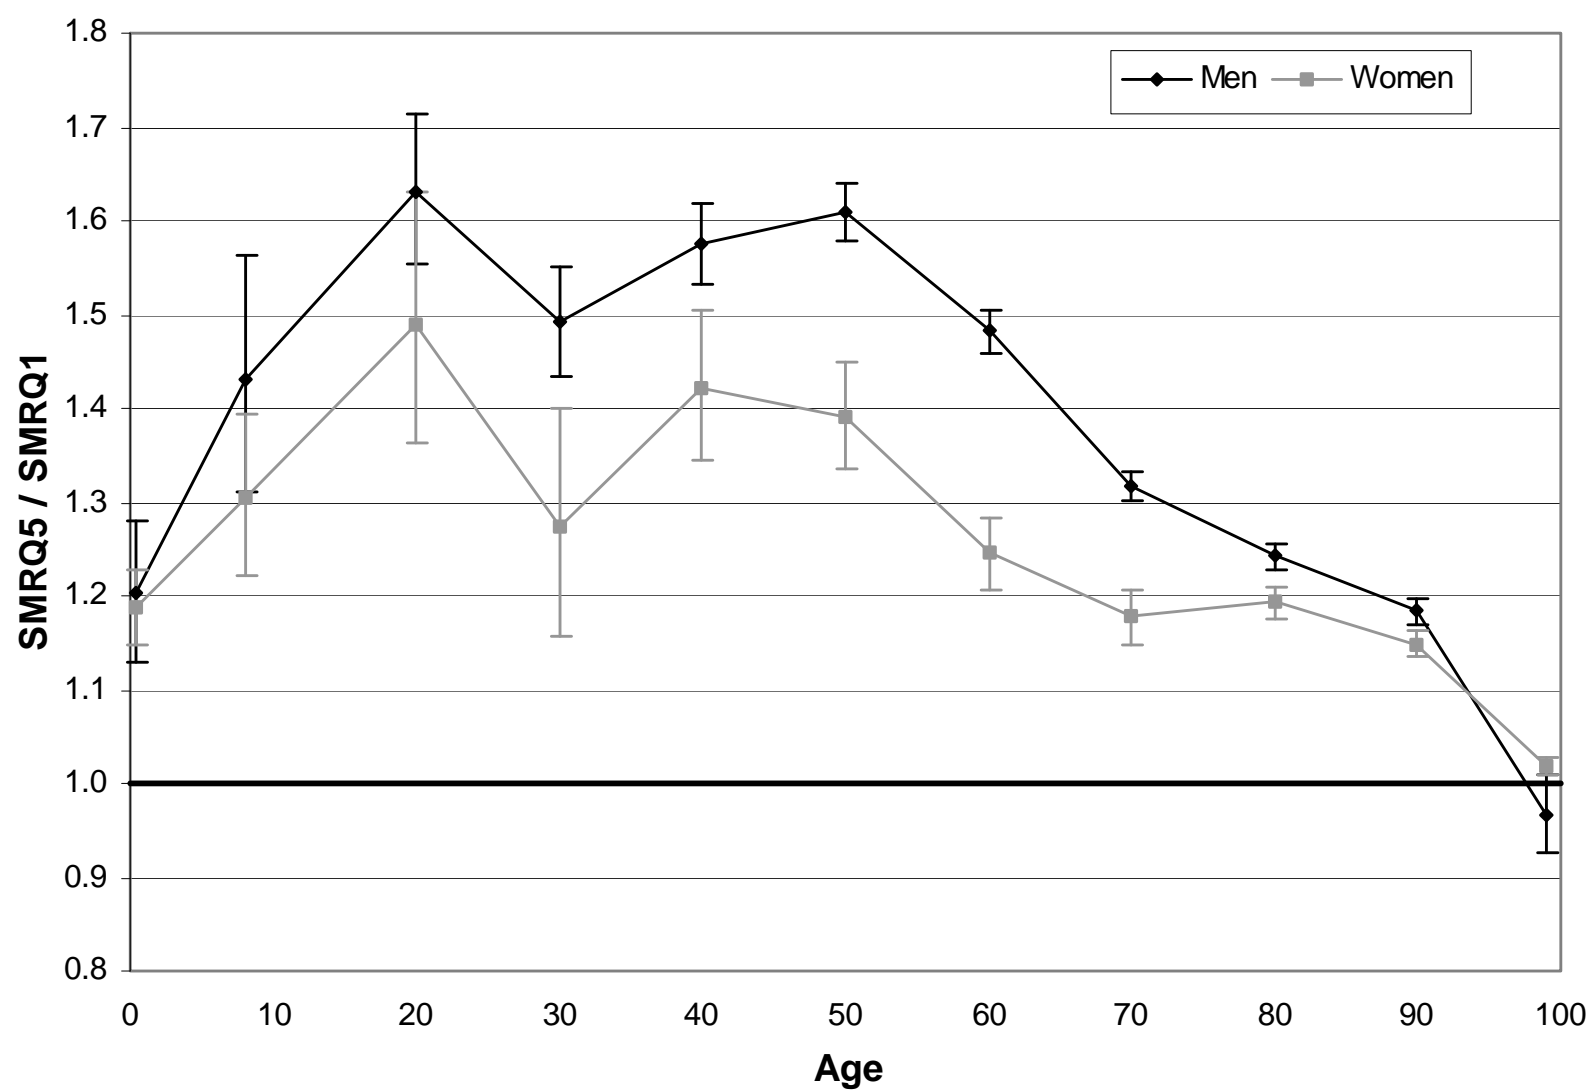

Supplement: 12889_2008_1436_MOESM4_ESM.pdf [file 12889_2008_1436_MOESM4_ESM.pdf]
